# Supplementary material for: Adsorption of Congo red from water with spindle-like boehmite: the role of lattice plane (020)
Source: Royal Society of Chemistry journal article supplement (doi:10.1039/c5ra24595h), 2016-01-01
Supplement: c5ra24595h1.pdf [file c5ra24595h1.pdf]

## Supporting information

Adsorption of Congo red from water with spindle-like boehmite:

The role of lattice plane (020)

Guangci Li <sup>a,\*</sup>, Yuanyuan Sun <sup>a</sup>, Xuebing Li <sup>a,\*</sup>, Yunqi Liu <sup>b</sup>

<sup>a</sup> Key Laboratory of Biofuels, Qingdao Institute of Bioenergy and Bioprocess Technology,

Chinese Academy of Science, Qingdao, 266101, PR China

<sup>b</sup> State Key Laboratory of Heavy Oil Processing, Key Laboratory of Catalysis, CNPC, China

University of Petroleum, Qingdao, 266555, PR China

---

\*Corresponding author. Tel.: +86-532-80662757; Fax: +86-532-80662757; E-mail address: [ligc@qibebt.ac.cn](mailto:ligc@qibebt.ac.cn) (G. Li); [lixb@qibebt.ac.cn](mailto:lixb@qibebt.ac.cn) (X. Li).

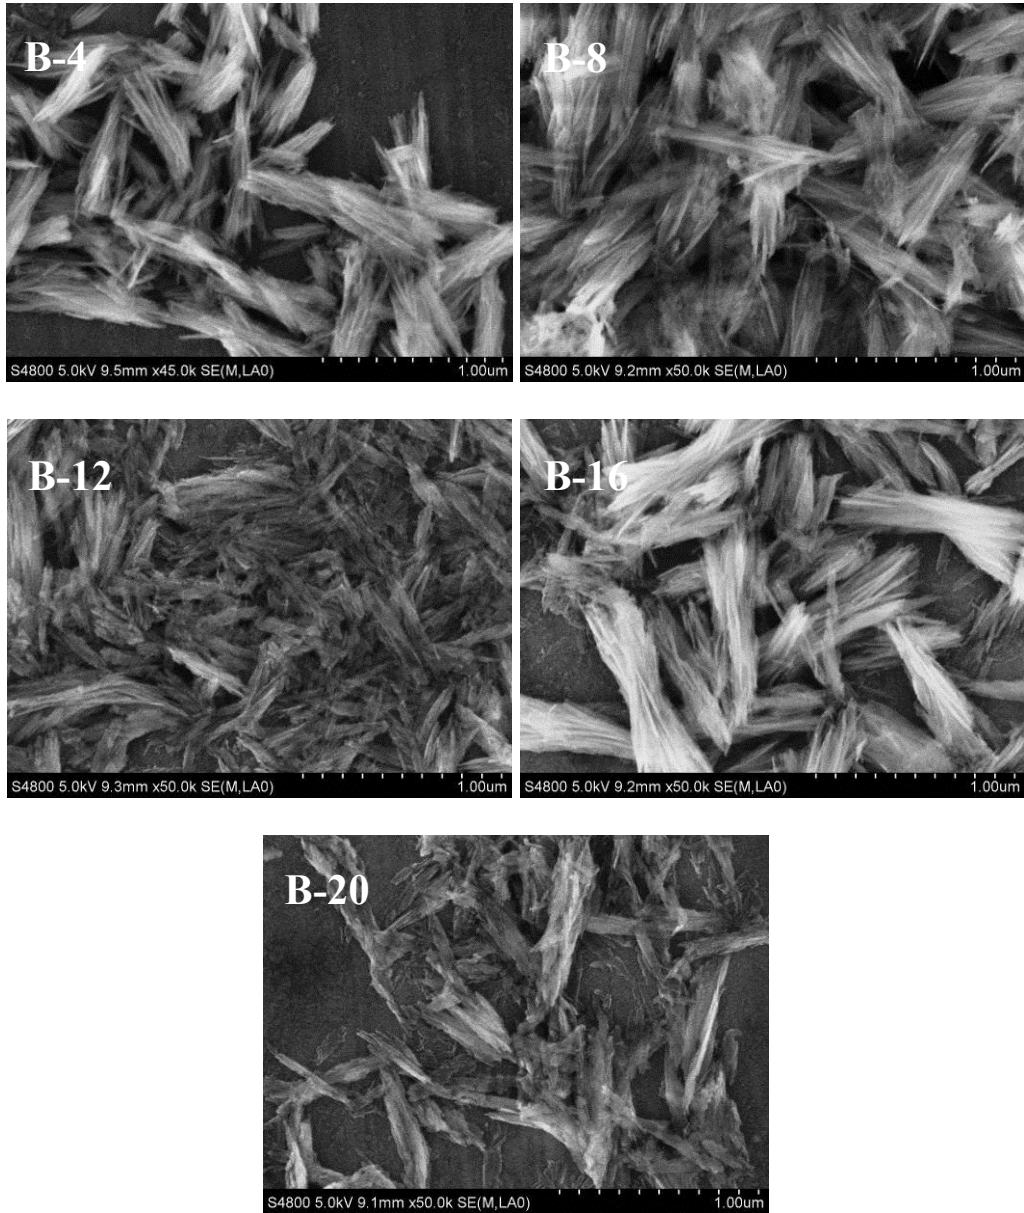

**Fig. S1** SEM images of the hydrated samples

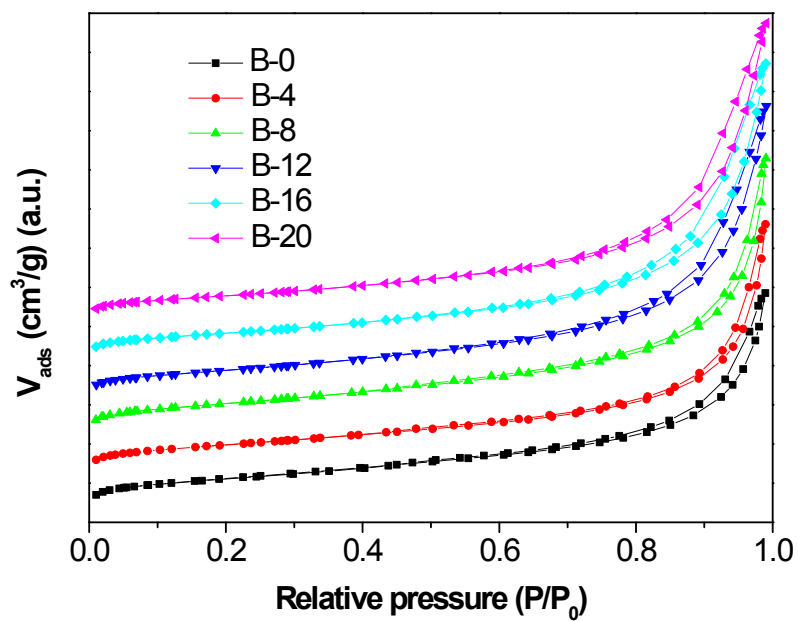

Fig. S2 N<sub>2</sub> adsorption/desorption isotherms for the different samples

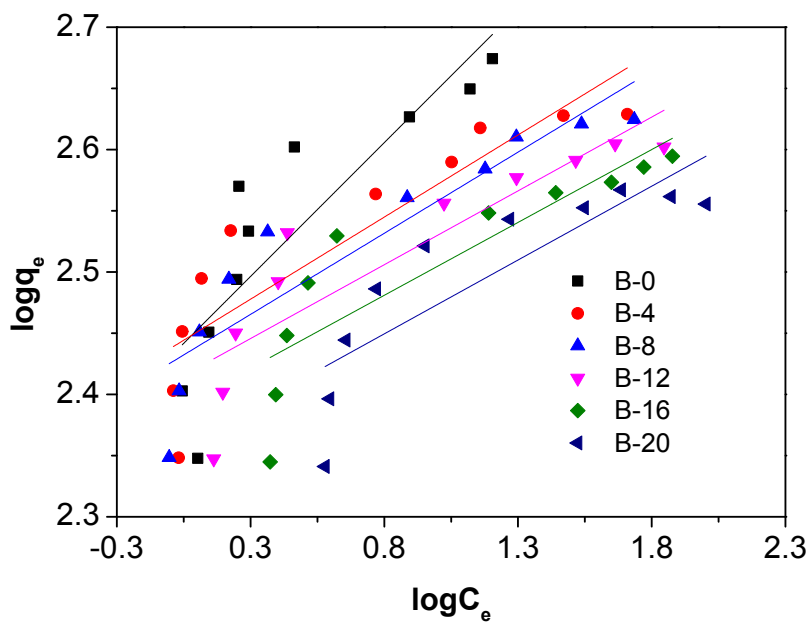

Fig. S3 Freundlich isotherms for the adsorption of CR onto sample B-0 at different temperatures

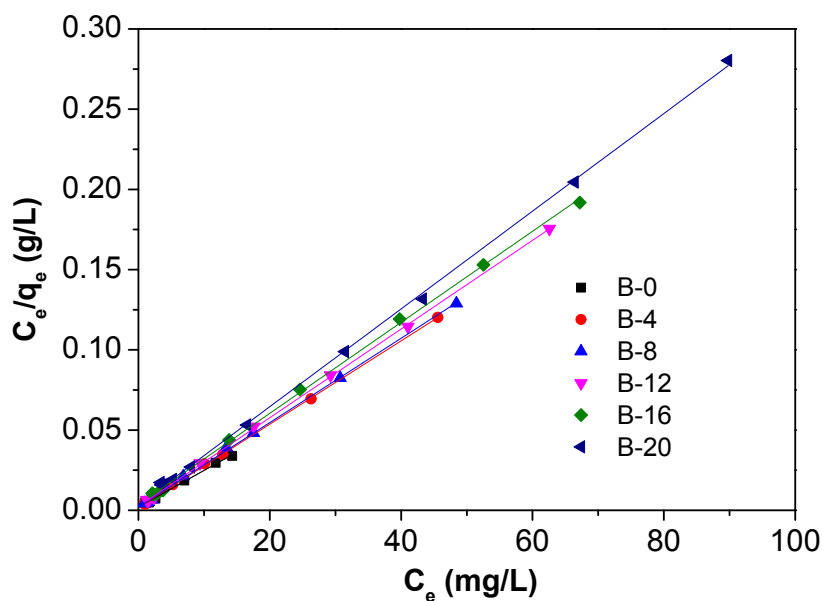

Fig. S4 Langmuir isotherms for the adsorption of CR onto different samples at 25 °C

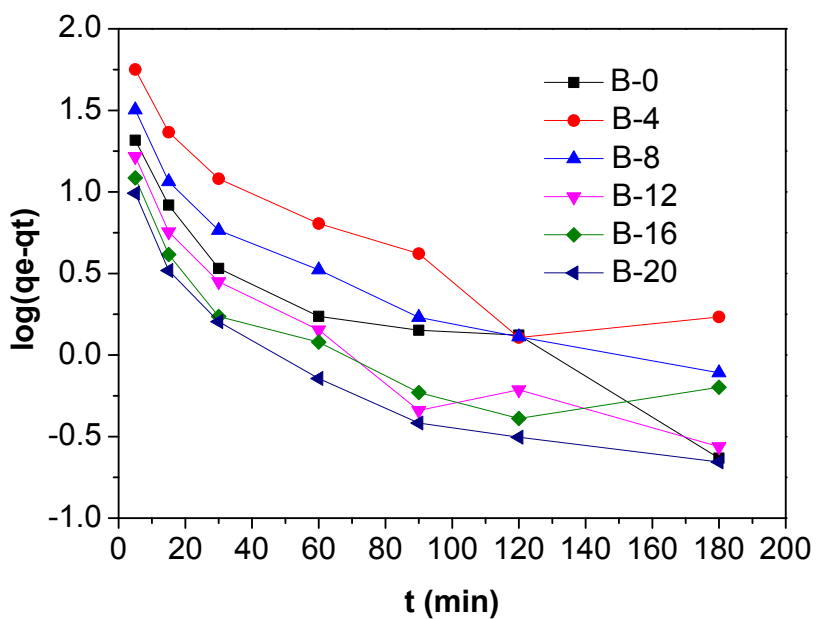

Fig. S5 Pseudo-first-order kinetics for the adsorption of CR onto different samples at 25 °C

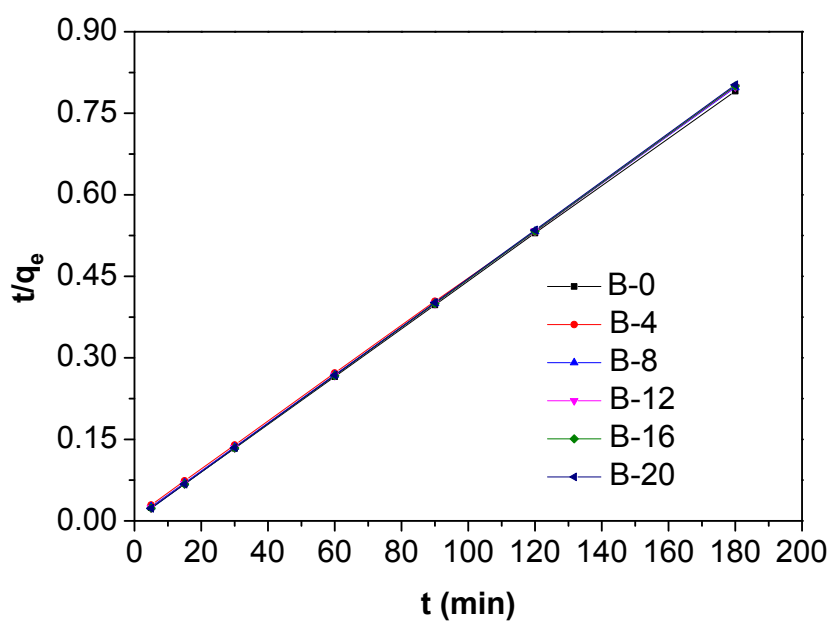

**Fig. S6** Pseudo-second-order kinetics for the adsorption of CR onto different samples at 25 °C

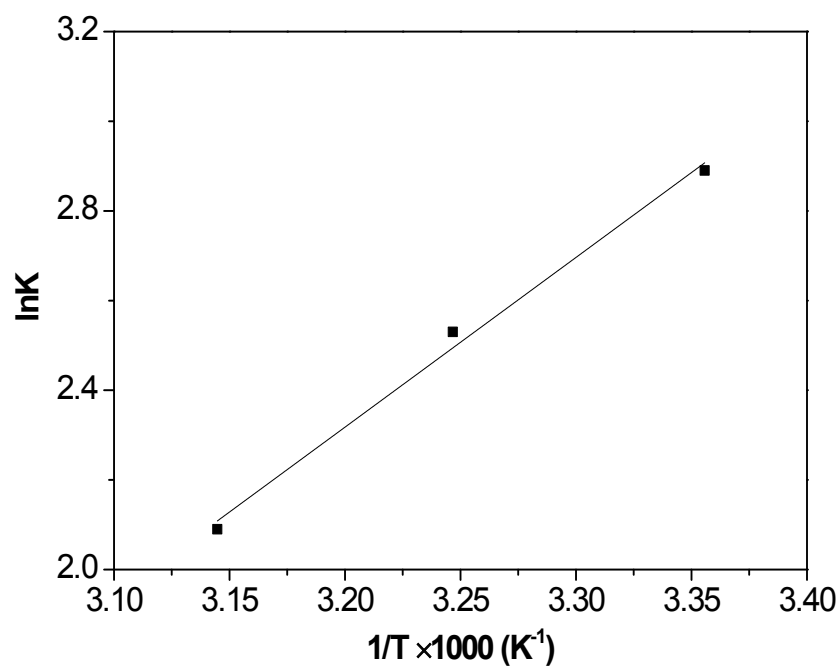

**Fig. S7** Plot of lnK versus 1/T for estimation of thermodynamic parameters for B-0
